# Supplementary material
Source: ML conference proceedings conference paper supplement (https://proceedings.mlr.press/v33/moeller14.html)
Supplement: Supplementary file [file moeller14-supp.pdf]

## A Proofs from Section 4

We collect together proofs and auxiliary algorithms from Section 4.

### A.1 Proof of Lemma 4.1

**Lemma A.1.** *The exponential of a matrix in the form  $\begin{pmatrix} a\mathbf{I}_n & \mathbf{u} \\ \mathbf{u}^\top & b \end{pmatrix}$ , where  $a$  and  $b$  are nonnegative, is*

$$e^\phi \begin{pmatrix} (\cosh \psi + \sinh \psi \cos \gamma) \hat{\mathbf{u}} \hat{\mathbf{u}}^\top & \sinh \psi \sin \gamma \hat{\mathbf{u}} \\ \sinh \psi \sin \gamma \hat{\mathbf{u}}^\top & \cosh \psi - \sinh \psi \cos \gamma \end{pmatrix} + e^a \begin{pmatrix} \mathbf{I}_n - \hat{\mathbf{u}} \hat{\mathbf{u}}^\top & 0 \\ 0 & 0 \end{pmatrix}, \quad (\text{A.1})$$

where  $\hat{\mathbf{u}}$  is the unit vector  $\mathbf{u}/\|\mathbf{u}\|$ ,  $\phi = (a+b)/2$ ,  $\psi = \sqrt{(a-b)^2/4 + \|\mathbf{u}\|^2}$ , and  $\gamma = \tan^{-1}(2\|\mathbf{u}\|/(a-b))$ .

We symbolically exponentiate an  $n+1 \times n+1$  matrix of the form

$$\mathbf{M} = \begin{pmatrix} a\mathbf{I}_n & \mathbf{u} \\ \mathbf{u}^\top & b \end{pmatrix}.$$

Since this matrix is real and symmetric, its eigenvalues  $\lambda_i$  are positive and its unit eigenvectors  $\mathbf{v}_i$  form an orthonormal basis. The method that we use to symbolically exponentiate it is to express it in the form

$$\mathbf{M} = \sum_{i=1}^n \lambda_i \mathbf{v}_i \mathbf{v}_i^\top.$$

The exponential then becomes

$$e^{\mathbf{M}} = \sum_{i=1}^n e^{\lambda_i} \mathbf{v}_i \mathbf{v}_i^\top.$$

As a matter of notation, let  $\hat{\mathbf{u}}$  be the unit vector such that  $\|\mathbf{u}\| \hat{\mathbf{u}} = \mathbf{u}$ .

**Eigenvalues.** The characteristic equation for  $\mathbf{M}$  is not difficult to calculate. It is:

$$(\lambda - a)^{n-1} (\lambda^2 - (a+b)\lambda + ab - \|\mathbf{u}\|^2). \quad (\text{A.2})$$

This yields  $n-1$  eigenvalues equal to  $a$ , and the other two equal to  $(a+b)/2 + \sqrt{(a-b)^2/4 + \|\mathbf{u}\|^2}$  and  $(a+b)/2 - \sqrt{(a-b)^2/4 + \|\mathbf{u}\|^2}$ . We label them  $\lambda_1$  and  $\lambda_2$ , respectively, and the rest are equal to  $a$ .

**Eigenvectors.** First we show that  $\mathbf{M}$  has two eigenvectors of the form  $(\mathbf{u}, c)^\top$ :

$$\begin{pmatrix} a\mathbf{I}_n & \mathbf{u} \\ \mathbf{u}^\top & b \end{pmatrix} \begin{pmatrix} \mathbf{u} \\ c \end{pmatrix} = \begin{pmatrix} (a+c)\mathbf{u} \\ \|\mathbf{u}\|^2 + bc \end{pmatrix},$$

So as long as we choose  $c$  such that  $c^2 + ac = \|\mathbf{u}\|^2 + bc$ , or  $c = (b-a)/2 \pm \sqrt{(a-b)^2/4 + \|\mathbf{u}\|^2}$ , then  $(\mathbf{u}, c)^\top$  is an eigenvector with eigenvalue  $a+c$ . These two eigenvalues are just  $\lambda_1$  and  $\lambda_2$ . We will call the corresponding eigenvectors  $\mathbf{v}_1$  and  $\mathbf{v}_2$ .

Since  $\mathbf{M}$  is symmetric, all of its eigenvectors are orthogonal. The remaining eigenvectors are of the form  $(\mathbf{w}, 0)^\top$ , where  $\mathbf{w}^\top \mathbf{u} = 0$ :

$$\begin{pmatrix} a\mathbf{I}_n & \mathbf{u} \\ \mathbf{u}^\top & b \end{pmatrix} \begin{pmatrix} \mathbf{w} \\ 0 \end{pmatrix} = \begin{pmatrix} a\mathbf{w} \\ 0 \end{pmatrix}.$$

Clearly the corresponding eigenvalue for any such eigenvector is  $a$ , so there are  $n-1$  of them. The corresponding parts of these eigenvectors are labeled  $\mathbf{w}_i$ , where  $3 \leq i \leq n+1$ , and we assume they are unit vectors.

Since

$$e^{\mathbf{M}} = \sum_{i=1}^n e^{\lambda_i} \mathbf{v}_i \mathbf{v}_i^\top,$$

and the eigenvalue  $a$  is of multiplicity  $n - 1$ , we have

$$\begin{aligned} e^{\mathbf{M}} &= e^{\lambda_1} \frac{\mathbf{v}_1 \mathbf{v}_1^\top}{\|\mathbf{v}_1\|^2} + e^{\lambda_2} \frac{\mathbf{v}_2 \mathbf{v}_2^\top}{\|\mathbf{v}_2\|^2} + e^a \sum_{i=3}^n \begin{pmatrix} \mathbf{w}_i \mathbf{w}_i^\top & \mathbf{0} \\ \mathbf{0}^\top & 0 \end{pmatrix} \\ &= \frac{e^{\lambda_1}}{\|\mathbf{u}\|^2 + c_1^2} \begin{pmatrix} \mathbf{u} \mathbf{u}^\top & c_1 \mathbf{u} \\ c_1 \mathbf{u}^\top & c_1^2 \end{pmatrix} + \frac{e^{\lambda_2}}{\|\mathbf{u}\|^2 + c_2^2} \begin{pmatrix} \mathbf{u} \mathbf{u}^\top & c_2 \mathbf{u} \\ c_2 \mathbf{u}^\top & c_2^2 \end{pmatrix} + e^a \begin{pmatrix} \mathbf{I}_n - \hat{\mathbf{u}} \hat{\mathbf{u}}^\top & \mathbf{0} \\ \mathbf{0}^\top & 0 \end{pmatrix} \end{aligned}$$

The last term in the equality is due to the fact that  $\hat{\mathbf{u}}$  and the  $\hat{\mathbf{w}}_i$  form an orthonormal basis for  $\mathbb{R}^n$ , so  $\hat{\mathbf{u}} \hat{\mathbf{u}}^\top + \sum \hat{\mathbf{w}}_i \hat{\mathbf{w}}_i^\top = \mathbf{I}_n$ .

We can reduce some of the factors in the expression by observing that  $\|\mathbf{u}\| = -c_1 c_2$ . Let

$$\begin{aligned} \beta_1^2 &= \|\mathbf{u}\|^2 / (\|\mathbf{u}\|^2 + c_1^2) = -c_1 c_2 / (c_1^2 - c_1 c_2) = c_2 / (c_2 - c_1) = c_2^2 / (c_2^2 - c_1 c_2) = c_2^2 / (\|\mathbf{u}\|^2 + c_2^2) \\ \beta_2^2 &= \|\mathbf{u}\|^2 / (\|\mathbf{u}\|^2 + c_2^2) = -c_1 c_2 / (c_2^2 - c_1 c_2) = -c_1 / (c_2 - c_1) = c_1^2 / (c_1^2 - c_1 c_2) = c_1^2 / (\|\mathbf{u}\|^2 + c_1^2) \end{aligned}$$

Note also that  $\beta_1^2 + \beta_2^2 = 1$ .

**The Exponential.** All that remains is to put everything together:

$$\begin{aligned} e^{\mathbf{M}} &= \sum_{i=1}^n e^{\lambda_i} \mathbf{v}_i \mathbf{v}_i^\top \\ &= e^{\lambda_1} \begin{pmatrix} \beta_1^2 \hat{\mathbf{u}} \hat{\mathbf{u}}^\top & \beta_1 \beta_2 \hat{\mathbf{u}} \\ \beta_1 \beta_2 \hat{\mathbf{u}}^\top & \beta_2^2 \end{pmatrix} + e^{\lambda_2} \begin{pmatrix} \beta_2^2 \hat{\mathbf{u}} \hat{\mathbf{u}}^\top & -\beta_1 \beta_2 \hat{\mathbf{u}} \\ -\beta_1 \beta_2 \hat{\mathbf{u}}^\top & \beta_1^2 \end{pmatrix} + e^a \begin{pmatrix} \mathbf{I}_n - \hat{\mathbf{u}} \hat{\mathbf{u}}^\top & \mathbf{0} \\ \mathbf{0}^\top & 0 \end{pmatrix}. \end{aligned}$$

Some variable substitutions will give us the form in (A.1);  $\lambda_1 = \phi + \psi$ ,  $\lambda_2 = \phi - \psi$ , and  $\beta_1 = \cos(\gamma/2)$ :

$$= e^\phi \begin{pmatrix} (\cosh \psi + \sinh \psi \cos \gamma) \hat{\mathbf{u}} \hat{\mathbf{u}}^\top & \sinh \psi \sin \gamma \hat{\mathbf{u}} \\ \sinh \psi \sin \gamma \hat{\mathbf{u}}^\top & \cosh \psi - \sinh \psi \cos \gamma \end{pmatrix} + e^a \begin{pmatrix} \mathbf{I}_n - \hat{\mathbf{u}} \hat{\mathbf{u}}^\top & \mathbf{0} \\ \mathbf{0} & 0 \end{pmatrix}.$$

## A.2 Selecting $\alpha$

Recall that  $\mathbf{u}_i = \mathbf{A}_i \alpha$  (from section 4). Let  $\hat{\mathbf{u}}_i = \mathbf{u}_i / \|\mathbf{u}_i\|$ . Let us denote the elements of the matrix in (A.1) as

$$\begin{aligned} p_i^{11} &= e^\phi (\cosh \psi + \sinh \psi \cos \gamma) &= e^\phi \cosh \psi \\ p_i^{12} &= e^\phi (\sinh \psi \sin \gamma) &= -e^\phi \sinh \psi \\ p_i^{22} &= e^\phi (\cosh \psi - \sinh \psi \cos \gamma) &= e^\phi \cosh \psi \end{aligned}$$

We observe that  $\hat{\mathbf{u}}_i \hat{\mathbf{u}}_i^\top$  is a rank one outer product with unit trace and that  $a_i$  is the same for all  $i$ . So  $\sum_i Q_i(\alpha) \bullet \mathbf{P}_i$  is given as:

$$\left( \sum_{i=0}^m (2p_i^{12} \hat{\mathbf{u}}_i^\top \mathbf{A}_i) \right) \alpha \geq -m(n-1)e^a - \sum_{i=0}^m (p_i^{11} + p_i^{22}s). \quad (\text{A.3})$$

It is worth noting that the right hand side bears a close resemblance to the trace of  $\mathbf{P}$ , which is  $m(n-1)e^a + \sum_{i=0}^m (p_i^{11} + p_i^{22})$  (the trace of  $\mathbf{I}_n$  is  $n$ , and the trace of  $\hat{\mathbf{u}}_i \hat{\mathbf{u}}_i^\top$  is always 1). We know that  $s = \omega = 1$  (see Section 4), so this makes the RHS equal to the trace. Also from normalization step of Algorithm 1 we know that  $\mathbf{P}$  is normalized with trace 1, so we have the following:

$$\left( \sum_{i=1}^m (2p_i^{12} \hat{\mathbf{u}}_i^\top \mathbf{A}_i) \right) \alpha^{(t)} \geq -1. \quad (\text{A.4})$$

**Practical Considerations.** We highlight two important practical consequences of our formulation. First, the procedure produces a very sparse update to  $\alpha$ : in each iteration, only two coordinates of  $\alpha$  are updated. This makes each iteration

very efficient, taking only linear time. Second, by expressing  $\mathbf{u}_i$  in terms of  $\mathbf{g}_i$  we never need to explicitly compute  $\mathbf{A}_i$  (as  $\mathbf{u}_i = \mathbf{A}_i\alpha$ ), which in turn means that we do not need to compute the (expensive) square root of  $\mathbf{G}_i$  explicitly.

Another beneficial feature of the dual-finding procedure for MKL is that terms involving the primal variables  $\mathbf{P}$  are either normalized (when we set the trace of  $\mathbf{P}$  to 1) or eliminated (due to the fact that we have a compact closed-form expression for  $\mathbf{P}$ ), *which means that we never have to explicitly maintain  $\mathbf{P}$* , save for a small number ( $4m$ ) of variables.

### A.3 Proof that $\rho^2$ is $O(1)$

**Lemma A.2.**  $\rho$  is bounded by  $3/2$ .

*Proof.*  $\rho$  is defined as the maximum of  $\|\mathbf{Q}(\alpha^{(t)})\|$  for all  $t$ . Here  $\|\cdot\|$  denotes the largest eigenvalue in absolute value [3]. Because  $s = \omega = 1$  (see Section 4), the eigenvalues of  $\mathbf{Q}_i(\alpha^{(t)})$  are 1 (with multiplicity  $n - 1$ ), and  $1 \pm \|\mathbf{A}_i\alpha^{(t)}\|$ . The greater of these in absolute value is clearly  $1 + \|\mathbf{A}_i\alpha^{(t)}\|$ .

$\|\mathbf{A}_i\alpha^{(t)}\|$  is equal to

$$((\alpha^{(t)})^T \mathbf{A}_i^T \mathbf{A}_i \alpha^{(t)})^{\frac{1}{2}} = \left( \frac{1}{r_i} (\alpha^{(t)})^T \mathbf{G}_i \alpha^{(t)} \right)^{\frac{1}{2}}.$$

$\alpha^{(t)}$  always has two nonzero elements, and they are equal to  $1/2$ . They also correspond to values of  $\mathbf{y}$  with opposite signs, so if  $j$  and  $k$  are the coordinates in question,  $(\alpha^{(t)})^T \mathbf{G}_i \alpha^{(t)} \leq (1/4)(\mathbf{G}_{i(jj)} + \mathbf{G}_{i(kk)})$ , because  $\mathbf{G}_{i(jk)}$  and  $\mathbf{G}_{i(kj)}$  are both negative. Because of the factor of  $1/r_i$ , and because  $r_i$  is the trace of  $\mathbf{G}_i$ ,  $\|\mathbf{A}_i\alpha^{(t)}\| \leq 1/2$ . This is true for any of the  $i$ , so the maximum eigenvalue of  $\mathbf{Q}(\alpha^{(t)})$  in absolute value is bounded by  $1 + 1/2 = 3/2$ .  $\square$

### A.4 Exponentiating $\mathbf{M}$

From  $\mathbf{M}_i^{(t)}$  in Algorithm 1 and (4.2), we have  $\mathbf{M}_i^{(t)} = \frac{1}{2\rho} (\mathbf{Q}_i(\alpha^{(t)}) + \rho \mathbf{I}_{n+1})$ , where  $\rho$  is a program parameter which is explained in 4.2.

Our  $\mathbf{Q}_i(\alpha) = \begin{pmatrix} \mathbf{I}_n & \mathbf{A}_i\alpha \\ (\mathbf{A}_i\alpha)^\top & 1 \end{pmatrix}$  is of the form  $\begin{pmatrix} a\mathbf{I}_n & \mathbf{u}_i \\ \mathbf{u}_i^\top & b \end{pmatrix}$ , where  $a = 1$  and  $b = 1$  are non-negative  $\forall i$  and  $\mathbf{u}_i = \mathbf{A}_i\alpha$ . So we have

$$\mathbf{u}_i^\top \mathbf{u}_i = (\mathbf{A}_i\alpha)^\top \mathbf{A}_i\alpha = \alpha^\top \mathbf{A}_i^\top \mathbf{A}_i \alpha = \alpha^\top \frac{1}{r_i} \mathbf{G}_i \alpha \tag{A.5}$$

where the last equality follows from  $\mathbf{A}_i^\top \mathbf{A}_i = \frac{1}{r_i} \mathbf{G}_i$  (cf. (4.2)). As we shall show in Algorithm 3, at each iteration the matrix to be exponentiated is a sum of matrices of the form  $\frac{1}{2\rho} (\mathbf{Q}_i(\sum_{t=1}^T \alpha^{(t)}) + \rho \mathbf{I}_{n+1})$ , so Lemma A.1 can be applied at every iteration. Additionally,  $a = b$ , so many of the substitutions simplify considerably:  $\phi = a$ ,  $\psi = \|\mathbf{u}\|$ ,  $\sin \gamma = \pm 1$ , and  $\cos \gamma = 0$ .

We provide in detail the algorithm we use to exponentiate the matrix  $\mathbf{M}$ . This subroutine is called from Algorithm 3 in Section 4.

**Practical considerations.** In Lemma A.1, large inputs to the functions  $\exp$ ,  $\cosh$ , and  $\sinh$  will cause them to rapidly overflow even at double-precision range. Fortunately there are two steps we can take. First,  $\exp(x)/2$  gets exponentially close to both  $\sinh(x)$  and  $\cosh(x)$  as  $x$  gets larger, so above a high enough value, we can simply approximate  $\sinh(x)$  and  $\cosh(x)$  with  $\exp(x)/2$ .

Because  $\exp$  can overflow just as much as  $\sinh$  or  $\cosh$ , this doesn't solve the problem completely. However, since  $\mathbf{P}$  is always normalized so that  $\text{tr}(\mathbf{P}) = 1$ , we can multiply the elements of  $\mathbf{P}$  by any factor we choose and the factor will be normalized out in the end. So above a certain value, we can use  $\exp$  alone and throw a ‘‘quashing’’ factor ( $e^{-\phi-q}$ ) into the equations before computing the result, and it will be normalized out later in the computation. For our purposes, setting  $q = 20$  suffices. Note that this trades overflow for underflow, but underflow can be interpreted merely as one kernel disappearing from significance.

---

**Algorithm 4** EXPONENTIATE- $M$

---

**Input:**  $\mathbf{y}, \alpha, \{\mathbf{G}_i\}, \varepsilon', \rho, t$

$\phi \leftarrow -\frac{\varepsilon'}{2\rho}(1+\rho)t$

**for**  $i \in [1..m]$  **do**

$\|\mathbf{u}_i\| \leftarrow \sqrt{\alpha^T \mathbf{G}_i \alpha}$

$\mathbf{g}_i \leftarrow \frac{1}{\|\mathbf{u}_i\|} \mathbf{G}_i \alpha$

$\psi_i \leftarrow \frac{\varepsilon'}{2\rho} \|\mathbf{u}_i\|$

**end for**

$q \leftarrow \max_i \psi_i$

**if**  $q < 20$  **then**

**for**  $i \in [1..m]$  **do**

$l_i^{11} \leftarrow \cosh(\psi_i)$

$l_i^{12} \leftarrow -\sinh(\psi_i)$

**end for**

$e_M \leftarrow 1$

**else**

**for**  $i \in [1..m]$  **do**

$l_i^{11} \leftarrow e^{\psi_i - q}$

$l_i^{12} \leftarrow -l_i^{11}$

**end for**

$e_M \leftarrow 2e^{-q}$

**end if**

$S \leftarrow m(n-1)e_M + 2\sum_i l_i^{11}$

**for**  $i \in [1..m]$  **do**

$l_i^{11} \leftarrow l_i^{11}/S$

$l_i^{12} \leftarrow l_i^{12}/S$

**end for**

$\mathbf{g} \leftarrow \sum_i 2l_i^{12} \mathbf{g}_i$

Return  $l_1^{12}, \mathbf{g}$

---
